# Supplementary material
Source: HighWire-hosted journal article supplement (https://erj.ersjournals.com/content/59/3/2103124)

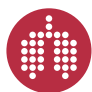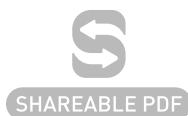

# Reply: Measurement of hypoxia in the lung in idiopathic pulmonary fibrosis: a matter of control

Joanna C. Porter <sup>1</sup>, Thida Win<sup>2</sup>, Kjell Erlandsson<sup>3</sup>, Kris Thielemans<sup>3</sup> and Ashley M. Groves<sup>3</sup>

<sup>1</sup>Centre for Inflammation and Tissue Repair, UCL and the UCLH Interstitial Lung Disease Service, London, UK. <sup>2</sup>Respiratory Medicine, Lister Hospital, Stevenage, UK. <sup>3</sup>Institute of Nuclear Medicine, UCL/H, London, UK.

Corresponding author: Joanna C. Porter ([joanna.porter@ucl.ac.uk](mailto:joanna.porter@ucl.ac.uk))

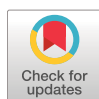

Shareable abstract (@ERSpublications)

*In vivo* PET imaging in IPF patients shows no significant evidence of lung tissue hypoxia

<https://bit.ly/3fywY7K>

**Cite this article as:** Porter JC, Win T, Erlandsson K, *et al.* Reply: Measurement of hypoxia in the lung in idiopathic pulmonary fibrosis: a matter of control. *Eur Respir J* 2022; 59: 2103124 [DOI: 10.1183/13993003.03124-2021].

This single-page version can be shared freely online.

Copyright ©The authors 2022.

This version is distributed under the terms of the Creative Commons Attribution Non-Commercial Licence 4.0. For commercial reproduction rights and permissions contact [permissions@ersnet.org](mailto:permissions@ersnet.org)

Received: 15 Dec 2021

Accepted: 10 Jan 2022

*Reply to P-S. Bellaye and co-workers:*

We thank P-S. Bellaye and co-workers for their considered and insightful response. Given their finding of [<sup>18</sup>F]fluoromisonidazole ([<sup>18</sup>F]F-MISO) uptake in the bleomycin mouse model of fibrosis [1], we too were surprised not to demonstrate a similar signal in patients with idiopathic pulmonary fibrosis (IPF). However, as acknowledged, there are other examples of positron emission tomography (PET) tracers, such as cis-4-[<sup>18</sup>F]-fluoro-L-proline, yielding PET signals in animal lung fibrosis models that have not been replicated in humans with fibrotic lung disease [2, 3].

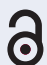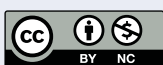

Supplement: inline-supplementary-material-1 [file inline-supplementary-material-1.pdf]
